# Supplementary material for: Characteristics, outcomes, and mortality amongst 133,589 patients with prevalent autoimmune diseases diagnosed with, and 48,418 hospitalised for COVID-19: a multinational distributed network cohort analysis
Source: bioRxiv or medRxiv preprint supplement (doi:10.1101/2020.11.24.20236802), 2020-11-27
Supplement: Supplementary file [file media-1.pdf]

## Supplementary Figure 1. Database selection process

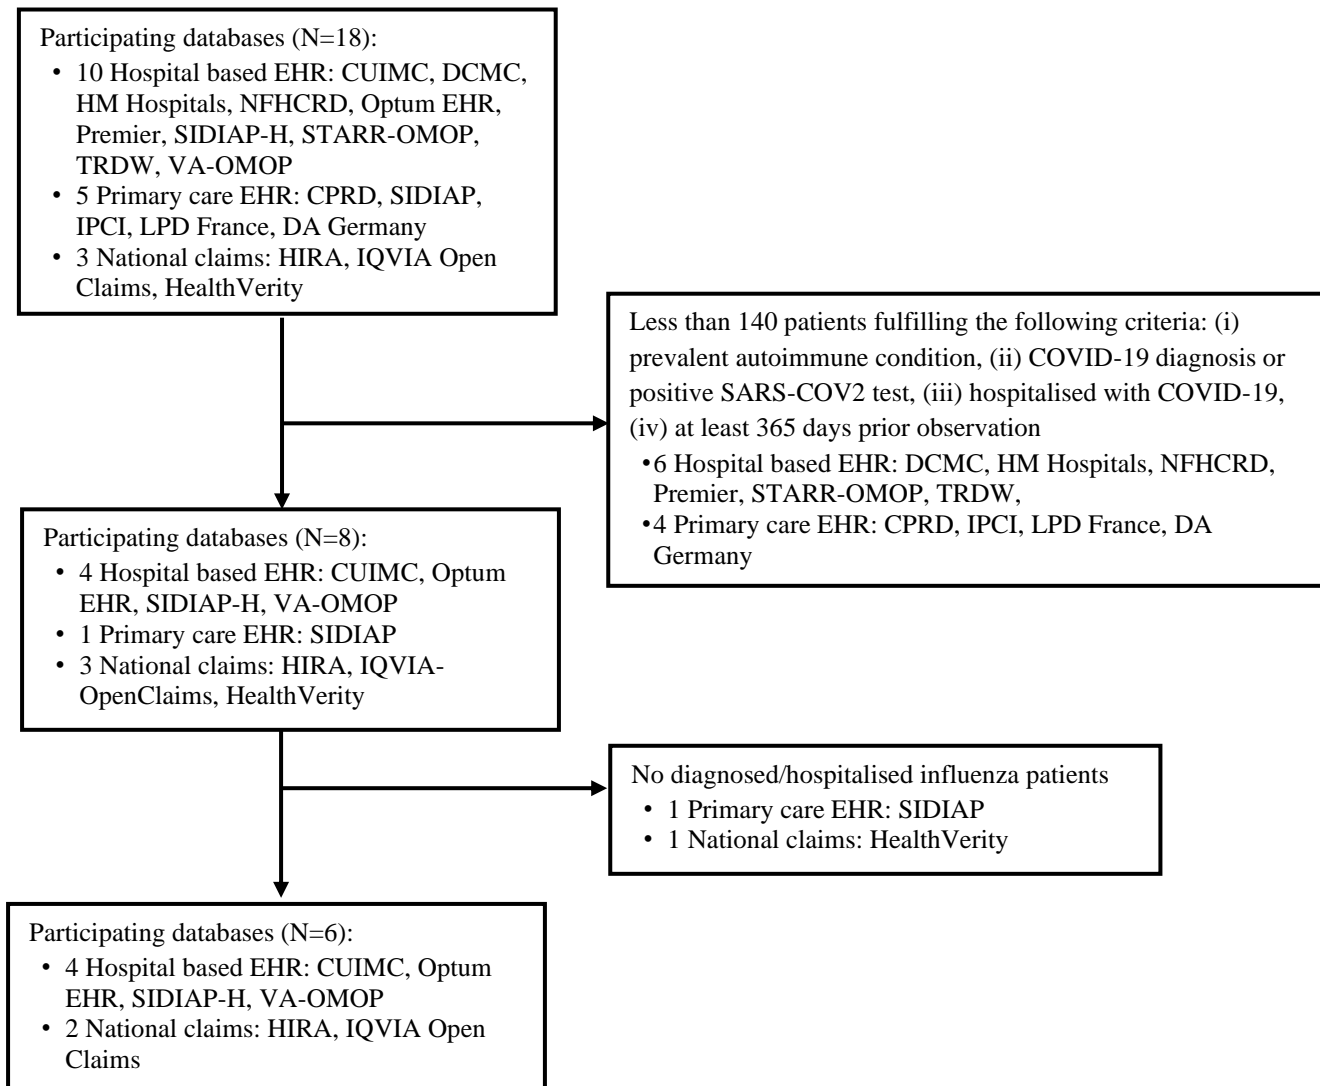

CPRD: Clinical Practice Research Datalink; CUIMC: Columbia University Irving Medical Center; DA Germany: IQVIA disease analyser Germany; DCMC: Daegu Catholic University Medical Center; EHR: Electronic health record; HIRA: Health Insurance Review & Assessment Service; LPD France: IQVIA Longitudinal Patient Data France; NFHCRD: Nanfang Hospital COVID-19 Research Database; IPCI: Integrated Primary Care Information; SIDIAP: Information System for Research in Primary Care; SIDIAP-H: SIDIAP– Hospitalisation Linked Data; TRDW: Tufts Research Data Warehouse, VA-OMOP: Department of Veterans Affairs

**Supplementary table 1. Prevalence of autoimmune diseases in the year prior to the index date in patients diagnosed with COVID-19**

The condition with the highest prevalence in most databases (highlighted in yellow) was reported as the prevalence for the respective autoimmune disease in Table 1 of the manuscript.

| Autoimmune disease              | Condition                                                             | CUIMC | HIRA       | IQVIA-<br>Open<br>Claims | Optum<br>EHR | SIDIAP-H   | VA-<br>OMOP |            |
|---------------------------------|-----------------------------------------------------------------------|-------|------------|--------------------------|--------------|------------|-------------|------------|
| <b>Type 1 Diabetes Mellitus</b> | acidosis due to type 1 diabetes mellitus                              | 0.0   | 0.0        | 0.0                      | 0.3          | 0.0        | 0.0         |            |
|                                 | disorder due to type 1 diabetes mellitus                              | 3.3   | 2.0        | 3.9                      | 4.8          | 1.2        | 4.4         |            |
|                                 | gangrene due to type 1 diabetes mellitus                              | 0.0   | 0.0        | 0.1                      | 0.1          | 0.0        | 0.0         |            |
|                                 | hyperglycemia due to type 1 diabetes mellitus                         | 1.9   | 0.0        | 1.9                      | 2.9          | <0.1       | 1.6         |            |
|                                 | hypoglycemia due to type 1 diabetes mellitus                          | 0.5   | 0.0        | 0.4                      | 0.8          | 0.0        | 0.4         |            |
|                                 | mild nonproliferative retinopathy due to type 1 diabetes mellitus     | <0.4  | 0.0        | 0.1                      | 0.3          | 0.0        | 0.3         |            |
|                                 | moderate nonproliferative retinopathy due to type 1 diabetes mellitus | 0.0   | 0.0        | 0.1                      | 0.1          | 0.0        | 0.2         |            |
|                                 | neuropathic arthropathy due to type 1 diabetes mellitus               | 0.0   | 0.0        | 0.0                      | 0.1          | 0.0        | 0.0         |            |
|                                 | neuropathy due to type 1 diabetes mellitus                            | 0.5   | 0.0        | 0.7                      | 0.8          | <0.1       | 0.6         |            |
|                                 | nonproliferative diabetic retinopathy due to type 1 diabetes mellitus | <0.4  | 0.0        | 0.2                      | 0.4          | 0.0        | 0.5         |            |
|                                 | peripheral circulatory disorder due to type 1 diabetes mellitus       | 0.6   | <0.6       | 0.4                      | 0.4          | 0.6        | 0.2         |            |
|                                 | peripheral neuropathy due to type 1 diabetes mellitus                 | 0.4   | 0.0        | 0.5                      | 0.7          | <0.1       | 0.4         |            |
|                                 | polyneuropathy due to type 1 diabetes mellitus                        | 0.4   | 0.0        | 0.5                      | 0.6          | <0.1       | 0.4         |            |
|                                 | pre-existing type 1 diabetes mellitus                                 | <0.4  | 0.0        | 0.0                      | 0.1          | <0.1       | 0.0         |            |
|                                 | pre-existing type 1 diabetes mellitus in pregnancy                    | <0.4  | 0.0        | 0.0                      | 0.1          | <0.1       | 0.0         |            |
|                                 | pregnancy and type 1 diabetes mellitus                                | <0.4  | 0.0        | 0.0                      | 0.1          | <0.1       | 0.0         |            |
|                                 | renal disorder due to type 1 diabetes mellitus                        | 1.1   | <0.6       | 0.9                      | 1.2          | 0.3        | 0.6         |            |
|                                 | <b>type 1 diabetes mellitus</b>                                       |       | <b>3.4</b> | <b>1.5</b>               | <b>5.8</b>   | <b>6.0</b> | <b>5.0</b>  | <b>4.4</b> |

|                             |                                                     |            |             |            |            |             |            |
|-----------------------------|-----------------------------------------------------|------------|-------------|------------|------------|-------------|------------|
|                             | type 1 diabetes mellitus uncontrolled               | 0.0        | 0.0         | 0.0        | 0.8        | 0.0         | 0.0        |
|                             | type 1 diabetes mellitus with arthropathy           | 0.0        | 0.0         | 0.0        | 0.1        | 0.0         | 0.0        |
|                             | type 1 diabetes mellitus without complication       | 2.6        | 1.0         | 3.7        | 3.8        | 4.9         | 2.2        |
|                             | ulcer of lower limb due to type 1 diabetes mellitus | <0.4       | 0.0         | 0.2        | 0.3        | <0.1        | 0.3        |
| <b>Rheumatoid arthritis</b> | myopathy due to rheumatoid arthritis                | 0.0        | 0.0         | 0.1        | 0.0        | 0.0         | 0.0        |
|                             | polyneuropathy in rheumatoid arthritis              | 0.0        | 0.0         | 0.1        | 0.0        | 0.0         | 0.0        |
|                             | <b>rheumatoid arthritis</b>                         | <b>4.0</b> | <b>18.9</b> | <b>4.8</b> | <b>8.7</b> | <b>4.1</b>  | <b>4.7</b> |
|                             | rheumatoid arthritis - ankle and/or foot            | <0.4       | 0.0         | 0.1        | 0.1        | 0.0         | 0.1        |
|                             | rheumatoid arthritis - hand joint                   | 0.5        | 0.0         | 0.2        | 0.5        | <0.1        | 0.2        |
|                             | rheumatoid arthritis of elbow                       | 0.0        | 0.0         | 0.0        | 0.1        | 0.0         | 0.0        |
|                             | rheumatoid arthritis of knee                        | <0.4       | 0.0         | 0.1        | 0.2        | 0.0         | 0.1        |
|                             | rheumatoid arthritis of shoulder                    | 0.0        | 0.0         | 0.1        | 0.2        | 0.0         | 0.0        |
|                             | rheumatoid arthritis of wrist                       | 0.0        | 0.0         | 0.1        | 0.1        | 0.0         | 0.1        |
|                             | rheumatoid lung disease with rheumatoid arthritis   | 0.0        | 0.0         | 0.1        | 0.0        | 0.0         | 0.1        |
|                             | seronegative rheumatoid arthritis                   | 1.2        | 2.3         | 0.9        | 1.7        | 0.9         | 0.6        |
|                             | seropositive rheumatoid arthritis                   | 1.9        | 5.0         | 2.0        | 3.9        | 2.9         | 1.9        |
| <b>Psoriasis</b>            | arthritis mutilans                                  | 0.0        | 0.7         | 0.1        | 0.1        | 0.0         | 0.6        |
|                             | generalized pustular psoriasis                      | 0.0        | <0.6        | 0.0        | 0.0        | <0.1        | 0.1        |
|                             | guttate psoriasis                                   | <0.4       | <0.6        | 0.0        | 0.2        | 1.9         | 0.2        |
|                             | localized pustular psoriasis                        | 0.0        | <0.6        | 0.0        | 0.1        | <0.1        | 0.0        |
|                             | <b>psoriasis</b>                                    | <b>3.7</b> | <b>8.2</b>  | <b>3.5</b> | <b>7.4</b> | <b>27.9</b> | <b>7.1</b> |
|                             | psoriasis vulgaris                                  | <0.4       | 2.8         | 1.3        | 1.0        | 0.3         | 2.6        |
|                             | psoriasis with arthropathy                          | 0.8        | 0.7         | 0.8        | 2.4        | 2.2         | 1.5        |
|                             | psoriatic arthritis                                 | 0.0        | 0.0         | 0.0        | 0.1        | <0.1        | 0.1        |
|                             | psoriatic arthritis mutilans                        | 0.0        | 0.0         | 0.1        | 0.1        | 0.0         | 0.6        |
|                             | pustular psoriasis                                  | 0.0        | 0.9         | 0.1        | 0.2        | <0.1        | 0.1        |
|                             | pustular psoriasis of palm of hand                  | 0.0        | <0.6        | 0.0        | 0.1        | <0.1        | 0.0        |
|                             | pustular psoriasis of palms and soles               | 0.0        | <0.6        | 0.0        | 0.1        | <0.1        | 0.0        |
|                             | pustular psoriasis of sole of foot                  | 0.0        | <0.6        | 0.0        | 0.1        | <0.1        | 0.0        |

|                                                     |                                                                  |      |      |     |     |      |     |
|-----------------------------------------------------|------------------------------------------------------------------|------|------|-----|-----|------|-----|
| <b>Psoriatic Arthritis</b>                          | arthritis mutilans                                               | 0.0  | 0.7  | 0.1 | 0.1 | 0.0  | 0.6 |
|                                                     | psoriasis with arthropathy                                       | 0.8  | 0.7  | 0.8 | 2.4 | 2.2  | 1.5 |
|                                                     | psoriatic arthritis mutilans                                     | 0.0  | 0.0  | 0.1 | 0.1 | 0.0  | 0.6 |
| <b>Multiple sclerosis</b>                           | multiple sclerosis                                               | 2.1  | <0.6 | 2.2 | 3.3 | 2.2  | 1.9 |
| <b>Systemic lupus erythematosus</b>                 | drug-induced systemic lupus erythematosus                        | <0.4 | 0.0  | 0.0 | 0.1 | 0.0  | 0.0 |
|                                                     | lung disease with systemic lupus erythematosus                   | <0.4 | 0.0  | 0.0 | 0.1 | 0.0  | 0.0 |
|                                                     | nephropathy co-occurrent and due to systemic lupus erythematosus | 0.8  | 0.0  | 0.2 | 0.6 | <0.1 | 0.1 |
|                                                     | nephrosis co-occurrent and due to systemic lupus erythematosus   | 0.8  | 0.0  | 0.2 | 0.6 | <0.1 | 0.1 |
|                                                     | sle glomerulonephritis syndrome                                  | 0.8  | 0.0  | 0.2 | 0.6 | <0.1 | 0.1 |
|                                                     | systemic lupus erythematosus                                     | 3.4  | 1.7  | 1.9 | 3.6 | 2.3  | 1.1 |
|                                                     | systemic lupus erythematosus with organ/system involvement       | 1.2  | 1.2  | 0.4 | 1.1 | <0.1 | 0.2 |
|                                                     | systemic lupus erythematosus with pericarditis                   | <0.4 | 0.0  | 0.0 | 0.1 | 0.0  | 0.0 |
| <b>Graves' disease</b>                              | graves' disease                                                  | 0.0  | 0.0  | 0.0 | 0.1 | 0.0  | 0.0 |
| <b>Hashimoto thyroiditis</b>                        | hashimoto thyroiditis                                            | 0.0  | 0.0  | 0.0 | 2.1 | 0.0  | 0.0 |
| <b>Myasthenia gravis</b>                            | myasthenia gravis                                                | 0.5  | <0.6 | 0.4 | 0.6 | 1.0  | 0.6 |
|                                                     | myasthenia gravis with exacerbation                              | <0.4 | 0.0  | 0.1 | 0.1 | <0.1 | 0.2 |
|                                                     | myasthenia gravis without exacerbation                           | 0.4  | 0.0  | 0.4 | 0.6 | 1.0  | 0.5 |
| <b>Vasculitis</b>                                   | acute febrile mucocutaneous lymph node syndrome                  | <0.4 | <0.6 | 0.0 | 0.1 | <0.1 | 0.0 |
|                                                     | acute hemorrhagic gastritis                                      | 0.0  | 6.9  | 0.3 | 0.3 | <0.1 | 0.3 |
|                                                     | antineutrophil cytoplasmic antibody positive vasculitis          | <0.4 | <0.6 | 0.1 | 0.2 | <0.1 | 0.1 |
|                                                     | arteritis                                                        | 1.3  | <0.6 | 0.7 | 1.1 | 3.5  | 0.6 |
|                                                     | autoimmune vasculitis                                            | <0.4 | <0.6 | 0.0 | 0.2 | <0.1 | 0.0 |
|                                                     | behcet's syndrome                                                | <0.4 | 0.9  | 0.0 | 0.1 | 0.4  | 0.1 |
|                                                     | capillaritis                                                     | <0.4 | <0.6 | 0.1 | 0.0 | <0.1 | 0.1 |
|                                                     | deep thrombophlebitis                                            | <0.4 | 1.6  | 0.3 | 0.1 | 6.6  | 0.2 |
| deep vein phlebitis and thrombophlebitis of the leg | <0.4                                                             | 1.6  | 0.3  | 0.1 | 6.6 | 0.2  |     |

|                                                              |      |      |     |     |      |     |
|--------------------------------------------------------------|------|------|-----|-----|------|-----|
| giant cell arteritis with polymyalgia rheumatica             | 0.0  | 0.0  | 0.0 | 0.0 | <0.1 | 0.1 |
| granulomatosis with polyangiitis                             | <0.4 | 0.0  | 0.1 | 0.2 | <0.1 | 0.1 |
| hypersensitivity angiitis                                    | <0.4 | <0.6 | 0.1 | 0.3 | <0.1 | 0.0 |
| idiopathic capillaritis                                      | <0.4 | <0.6 | 0.1 | 0.0 | <0.1 | 0.1 |
| necrotizing vasculitis                                       | <0.4 | <0.6 | 0.1 | 0.1 | 0.8  | 0.1 |
| phlebitis                                                    | 2.1  | 4.7  | 2.6 | 3.6 | 12.8 | 1.8 |
| phlebitis and thrombophlebitis                               | 0.7  | 1.6  | 0.9 | 1.1 | 10.2 | 0.6 |
| phlebitis and thrombophlebitis of intracranial sinuses       | 0.0  | 0.0  | 0.0 | 0.1 | 0.0  | 0.0 |
| phlebitis of deep veins of lower extremity                   | <0.4 | 1.6  | 0.4 | 0.2 | 6.6  | 0.3 |
| phlebitis of lower limb vein                                 | 1.5  | 2.9  | 2.0 | 2.6 | 9.2  | 1.3 |
| phlebitis of superficial veins of lower extremity            | <0.4 | <0.6 | 0.4 | 0.5 | 0.1  | 0.3 |
| phlebitis of the femoral vein                                | 0.0  | 0.0  | 0.1 | 0.0 | <0.1 | 0.1 |
| pigmented purpuric lichenoid dermatitis of gougerot and blum | <0.4 | <0.6 | 0.1 | 0.0 | <0.1 | 0.1 |
| polyarteritis                                                | 0.0  | <0.6 | 0.1 | 0.1 | <0.1 | 0.1 |
| polyarteritis nodosa                                         | 0.0  | <0.6 | 0.1 | 0.1 | <0.1 | 0.1 |
| primary systemic arteritis                                   | <0.4 | <0.6 | 0.1 | 0.1 | 0.2  | 0.1 |
| primary systemic vasculitis                                  | 0.5  | 1.7  | 0.2 | 0.5 | 0.6  | 0.3 |
| retinal vasculitis                                           | <0.4 | 0.0  | 0.0 | 0.0 | 0.0  | 0.1 |
| rheumatoid vasculitis                                        | <0.4 | <0.6 | 0.0 | 0.1 | <0.1 | 0.0 |
| secondary systemic vasculitis                                | <0.4 | <0.6 | 0.1 | 0.2 | <0.1 | 0.1 |
| small vessel vasculitis                                      | <0.4 | <0.6 | 0.2 | 0.4 | 0.2  | 0.2 |
| small vessel vasculitis caused by immune complex             | <0.4 | <0.6 | 0.0 | 0.2 | <0.1 | 0.0 |
| systemic vasculitis                                          | 0.9  | 2.6  | 0.4 | 0.7 | 0.8  | 0.4 |
| temporal arteritis                                           | <0.4 | <0.6 | 0.3 | 0.4 | 0.8  | 0.3 |
| thromboangiitis                                              | <0.4 | <0.6 | 0.0 | 0.0 | <0.1 | 0.1 |
| thromboangiitis obliterans                                   | <0.4 | <0.6 | 0.0 | 0.0 | <0.1 | 0.1 |
| thrombophlebitis                                             | 0.7  | 3.3  | 0.9 | 1.2 | 10.2 | 0.6 |
| thrombophlebitis of deep veins of lower extremity            | <0.4 | 1.6  | 0.3 | 0.1 | 6.6  | 0.2 |

|                           |                                                                 |            |                |            |            |             |            |
|---------------------------|-----------------------------------------------------------------|------------|----------------|------------|------------|-------------|------------|
|                           | thrombophlebitis of lower extremities                           | <0.4       | 2.3            | 0.3        | 0.1        | 6.6         | 0.2        |
|                           | varicose veins of lower extremity with inflammation             | 1.2        | 1.2            | 1.4        | 1.9        | 2.5         | 0.8        |
|                           | varicose veins of lower extremity with ulcer and inflammation   | <0.4       | 0.0            | 0.2        | 0.2        | <0.1        | 0.2        |
|                           | <b>vasculitis</b>                                               | <b>4.2</b> | <b>14.4</b>    | <b>4.0</b> | <b>5.7</b> | <b>17.5</b> | <b>3.3</b> |
|                           | vasculitis of medium sized vessel                               | <0.4       | <0.6           | 0.1        | 0.1        | 0.2         | 0.1        |
|                           | vasculitis of the skin                                          | 0.0        | <0.6           | 0.1        | 0.2        | 0.1         | 0.2        |
| <b>Pernicious anaemia</b> | <b>pernicious anaemia</b>                                       | <b>0.0</b> | <b>0.0</b>     | <b>0.0</b> | <b>0.5</b> | <b>0.0</b>  | <b>0.0</b> |
| <b>Coeliac disease</b>    | <b>coeliac disease</b>                                          | <b>0.9</b> | <b>&lt;0.6</b> | <b>0.5</b> | <b>1.6</b> | <b>5.1</b>  | <b>0.7</b> |
| <b>Scleroderma</b>        | crest syndrome                                                  | <0.4       | 0.0            | 0.1        | 0.1        | 0.0         | 0.0        |
|                           | limited systemic sclerosis                                      | <0.4       | 0.0            | 0.1        | 0.1        | 0.0         | 0.0        |
|                           | localized scleroderma                                           | <0.4       | <0.6           | 0.1        | 0.5        | 0.3         | 0.1        |
|                           | <b>systemic sclerosis</b>                                       | <b>0.6</b> | <b>&lt;0.6</b> | <b>0.2</b> | <b>0.4</b> | <b>0.8</b>  | <b>0.2</b> |
|                           | systemic sclerosis with limited cutaneous involvement           | <0.4       | 0.0            | 0.1        | 0.1        | 0.0         | 0.0        |
| <b>Sarcoidosis</b>        | cardiac sarcoidosis                                             | <0.4       | 0.0            | 0.0        | 0.1        | 0.0         | 0.0        |
|                           | cutaneous sarcoidosis                                           | <0.4       | 0.0            | 0.0        | 0.1        | <0.1        | 0.2        |
|                           | lymph node sarcoidosis                                          | 0.0        | 0.0            | 0.0        | 0.0        | <0.1        | 0.1        |
|                           | pulmonary sarcoidosis                                           | 1.0        | 0.0            | 0.5        | 0.7        | 0.3         | 1.8        |
|                           | sarcoid heart muscle disease                                    | <0.4       | 0.0            | 0.0        | 0.1        | 0.0         | 0.0        |
|                           | <b>sarcoidosis</b>                                              | <b>2.7</b> | <b>0.0</b>     | <b>1.0</b> | <b>2.1</b> | <b>1.1</b>  | <b>2.6</b> |
|                           | sarcoidosis of lung with sarcoidosis of lymph nodes             | <0.4       | 0.0            | 0.1        | 0.1        | <0.1        | 0.3        |
| <b>Ulcerative colitis</b> | abscess of intestine co-occurrent and due to ulcerative colitis | 0.0        | 0.0            | 0.0        | 0.0        | 0.0         | 0.1        |
|                           | chronic ulcerative colitis                                      | 0.6        | 0.0            | 0.4        | 1.2        | 0.1         | 0.2        |
|                           | chronic ulcerative enterocolitis                                | 0.0        | 0.0            | 0.0        | 0.1        | 0.0         | 0.0        |
|                           | chronic ulcerative pancolitis                                   | 0.6        | 0.0            | 0.3        | 0.9        | <0.1        | 0.2        |
|                           | chronic ulcerative rectosigmoiditis                             | 0.0        | 0.0            | 0.1        | 0.3        | <0.1        | 0.1        |
|                           | complication due to chronic ulcerative pancolitis               | <0.4       | 0.0            | 0.1        | 0.2        | 0.0         | 0.1        |

|                        |                                                                                           |            |                |            |            |            |            |
|------------------------|-------------------------------------------------------------------------------------------|------------|----------------|------------|------------|------------|------------|
|                        | complication due to chronic ulcerative rectosigmoiditis                                   | 0.0        | 0.0            | 0.0        | 0.1        | 0.0        | 0.0        |
|                        | complication due to ulcerative colitis                                                    | 0.8        | 0.0            | 0.3        | 0.9        | <0.1       | 0.8        |
|                        | fistula of intestine due to ulcerative colitis                                            | 0.0        | 0.0            | 0.0        | 0.0        | 0.0        | 0.1        |
|                        | intestinal obstruction due to ulcerative colitis                                          | 0.0        | 0.0            | 0.0        | 0.0        | 0.0        | 0.1        |
|                        | left sided ulcerative colitis                                                             | <0.4       | 0.0            | 0.1        | 0.2        | <0.1       | 0.4        |
|                        | rectal hemorrhage due to chronic ulcerative proctocolitis                                 | <0.4       | 0.0            | 0.1        | 0.2        | <0.1       | 0.0        |
|                        | rectal hemorrhage due to chronic ulcerative rectosigmoiditis                              | <0.4       | 0.0            | 0.0        | 0.1        | 0.0        | 0.0        |
|                        | rectal hemorrhage due to ulcerative colitis                                               | <0.4       | 0.0            | 0.2        | 0.5        | <0.1       | 0.7        |
|                        | <b>ulcerative colitis</b>                                                                 | <b>1.9</b> | <b>&lt;0.6</b> | <b>1.3</b> | <b>2.5</b> | <b>4.1</b> | <b>2.6</b> |
|                        | ulcerative enterocolitis                                                                  | 0.0        | 0.0            | 0.0        | 0.1        | 0.0        | 0.0        |
|                        | ulcerative proctocolitis                                                                  | 0.6        | 0.0            | 0.3        | 0.9        | <0.1       | 0.2        |
|                        | ulcerative proctocolitis                                                                  | 0.0        | 0.0            | 0.1        | 0.3        | <0.1       | 0.1        |
| <b>Crohn's disease</b> | abscess of intestine co-occurrent and due to crohn's disease                              | <0.4       | 0.0            | 0.0        | 0.1        | 0.0        | 0.1        |
|                        | abscess of intestine co-occurrent and due to crohn's disease of large intestine           | <0.4       | 0.0            | 0.0        | 0.1        | 0.0        | 0.1        |
|                        | abscess of intestine co-occurrent and due to crohn's disease of small and large intestine | <0.4       | 0.0            | 0.0        | 0.0        | 0.0        | 0.1        |
|                        | abscess of intestine co-occurrent and due to crohn's disease of small intestine           | <0.4       | 0.0            | 0.0        | 0.1        | 0.0        | 0.1        |
|                        | complication due to crohn's disease                                                       | 1.7        | 0.0            | 0.6        | 1.8        | 0.1        | 1.1        |
|                        | complication due to crohn's disease of large intestine                                    | 1.2        | 0.0            | 0.3        | 1.0        | 0.0        | 0.6        |
|                        | complication due to crohn's disease of small and large intestines                         | 0.9        | 0.0            | 0.1        | 0.5        | 0.0        | 0.3        |
|                        | complication due to crohn's disease of small intestine                                    | 1.3        | 0.0            | 0.3        | 0.9        | <0.1       | 0.5        |
|                        | <b>crohn's disease</b>                                                                    | <b>2.3</b> | <b>&lt;0.6</b> | <b>1.2</b> | <b>3.0</b> | <b>2.9</b> | <b>1.6</b> |
|                        | crohn's disease of intestine                                                              | 1.4        | <0.6           | 0.7        | 1.9        | 0.3        | 0.9        |
|                        | crohn's disease of large bowel                                                            | 1.0        | 0.0            | 0.4        | 1.3        | <0.1       | 0.6        |

|                                                                            |      |      |     |     |      |     |
|----------------------------------------------------------------------------|------|------|-----|-----|------|-----|
| crohn's disease of small and large intestines                              | 0.5  | 0.0  | 0.2 | 0.5 | 0.0  | 0.4 |
| crohn's disease of small intestine                                         | 1.0  | <0.6 | 0.5 | 1.2 | 0.2  | 0.7 |
| fistula of intestine due to crohn's disease of small and large intestine   | <0.4 | 0.0  | 0.0 | 0.1 | 0.0  | 0.1 |
| fistula of large intestine due to crohn's disease                          | 0.0  | 0.0  | 0.0 | 0.2 | 0.0  | 0.1 |
| fistula of small intestine due to crohn's disease                          | <0.4 | 0.0  | 0.0 | 0.1 | <0.1 | 0.0 |
| gastrointestinal crohn's disease                                           | 1.4  | <0.6 | 0.7 | 1.9 | 0.3  | 0.9 |
| intestinal obstruction due to crohn's disease                              | <0.4 | 0.0  | 0.1 | 0.3 | <0.1 | 0.2 |
| intestinal obstruction due to crohn's disease of large intestine           | <0.4 | 0.0  | 0.1 | 0.2 | 0.0  | 0.1 |
| intestinal obstruction due to crohn's disease of small and large intestine | <0.4 | 0.0  | 0.0 | 0.2 | 0.0  | 0.1 |
| intestinal obstruction due to crohn's disease of small intestine           | <0.4 | 0.0  | 0.1 | 0.3 | <0.1 | 0.2 |
| rectal hemorrhage due to crohn's disease                                   | <0.4 | 0.0  | 0.1 | 0.2 | 0.0  | 0.1 |
| rectal hemorrhage due to crohn's disease of large intestine                | <0.4 | 0.0  | 0.0 | 0.1 | 0.0  | 0.1 |
| rectal hemorrhage due to crohn's disease of small intestine                | 0.0  | 0.0  | 0.0 | 0.1 | 0.0  | 0.1 |



## Supplementary table 2. Prevalence of autoimmune diseases in the year prior to the index date in patients hospitalised with COVID-19

The condition with the highest prevalence in most databases (highlighted in yellow) was reported as the prevalence for the respective autoimmune disease in Table 2 of the manuscript.

| Autoimmune disease              | Condition                                                             | CUIMC | HIRA       | IQVIA-<br>Open<br>Claims | Optum<br>EHR | SIDIAP-H   | VA-<br>OMOP |            |
|---------------------------------|-----------------------------------------------------------------------|-------|------------|--------------------------|--------------|------------|-------------|------------|
| <b>Type 1 Diabetes Mellitus</b> | acidosis due to type 1 diabetes mellitus                              | <0.9  | 0.0        | 0.1                      | 0.6          | 0.0        | <0.2        |            |
|                                 | disorder due to type 1 diabetes mellitus                              | 3.8   | 2.0        | 5.4                      | 6.9          | 1.4        | 5.6         |            |
|                                 | gangrene due to type 1 diabetes mellitus                              | 0.0   | 0.0        | 0.1                      | <0.2         | 0.0        | <0.2        |            |
|                                 | hyperglycemia due to type 1 diabetes mellitus                         | 2.7   | 0.0        | 2.4                      | 3.7          | <0.6       | 2.0         |            |
|                                 | hypoglycemia due to type 1 diabetes mellitus                          | <0.9  | 0.0        | 0.6                      | 1.1          | 0.0        | 0.5         |            |
|                                 | mild nonproliferative retinopathy due to type 1 diabetes mellitus     | 0.0   | 0.0        | 0.2                      | 0.2          | 0.0        | 0.3         |            |
|                                 | moderate nonproliferative retinopathy due to type 1 diabetes mellitus | 0.0   | 0.0        | 0.1                      | <0.2         | 0.0        | 0.2         |            |
|                                 | neuropathic arthropathy due to type 1 diabetes mellitus               | 0.0   | 0.0        | 0.1                      | 0.2          | 0.0        | <0.2        |            |
|                                 | neuropathy due to type 1 diabetes mellitus                            | <0.9  | 0.0        | 1.0                      | 1.5          | <0.6       | 0.9         |            |
|                                 | nonproliferative diabetic retinopathy due to type 1 diabetes mellitus | 0.0   | 0.0        | 0.3                      | 0.4          | 0.0        | 0.6         |            |
|                                 | peripheral circulatory disorder due to type 1 diabetes mellitus       | <0.9  | <0.6       | 0.6                      | 0.7          | 0.7        | 0.4         |            |
|                                 | peripheral neuropathy due to type 1 diabetes mellitus                 | <0.9  | 0.0        | 0.8                      | 1.2          | <0.6       | 0.8         |            |
|                                 | polyneuropathy due to type 1 diabetes mellitus                        | <0.9  | 0.0        | 0.7                      | 1.0          | <0.6       | 0.5         |            |
|                                 | pre-existing type 1 diabetes mellitus                                 | 0.0   | 0.0        | 0.1                      | 0.3          | 0.0        | 0.0         |            |
|                                 | pre-existing type 1 diabetes mellitus in pregnancy                    | 0.0   | 0.0        | 0.1                      | 0.3          | 0.0        | 0.0         |            |
|                                 | pregnancy and type 1 diabetes mellitus                                | 0.0   | 0.0        | 0.1                      | 0.3          | 0.0        | 0.0         |            |
|                                 | renal disorder due to type 1 diabetes mellitus                        | 1.4   | <0.6       | 1.5                      | 2.4          | 0.0        | 1.1         |            |
|                                 | <b>type 1 diabetes mellitus</b>                                       |       | <b>4.8</b> | <b>1.5</b>               | <b>7.5</b>   | <b>7.5</b> | <b>4.4</b>  | <b>5.3</b> |

|                                     |                                                                  |            |                |            |            |             |            |
|-------------------------------------|------------------------------------------------------------------|------------|----------------|------------|------------|-------------|------------|
|                                     | type 1 diabetes mellitus uncontrolled                            | 0.0        | 0.0            | 0.0        | 0.8        | 0.0         | 0.0        |
|                                     | type 1 diabetes mellitus with arthropathy                        | 0.0        | 0.0            | 0.1        | 0.2        | 0.0         | <0.2       |
|                                     | type 1 diabetes mellitus without complication                    | 3.6        | 1.0            | 4.6        | 4.0        | 4.3         | 2.3        |
|                                     | ulcer of lower limb due to type 1 diabetes mellitus              | <0.9       | 0.0            | 0.4        | 0.7        | <0.6        | 0.7        |
| <b>Rheumatoid arthritis</b>         | myopathy due to rheumatoid arthritis                             | 0.0        | 0.0            | 0.1        | 0.0        | 0.0         | 0.0        |
|                                     | polyneuropathy in rheumatoid arthritis                           | 0.0        | 0.0            | 0.1        | <0.2       | 0.0         | 0.0        |
|                                     | <b>rheumatoid arthritis</b>                                      | <b>4.8</b> | <b>18.9</b>    | <b>4.9</b> | <b>8.8</b> | <b>5.4</b>  | <b>4.0</b> |
|                                     | rheumatoid arthritis - ankle and/or foot                         | 0.0        | 0.0            | 0.1        | <0.2       | 0.0         | <0.2       |
|                                     | rheumatoid arthritis - hand joint                                | <0.9       | 0.0            | 0.2        | 0.5        | <0.6        | <0.2       |
|                                     | rheumatoid arthritis of knee                                     | <0.9       | 0.0            | 0.1        | 0.2        | 0.0         | 0.2        |
|                                     | rheumatoid arthritis of shoulder                                 | 0.0        | 0.0            | 0.1        | 0.3        | 0.0         | <0.2       |
|                                     | rheumatoid arthritis of wrist                                    | 0.0        | 0.0            | 0.1        | <0.2       | 0.0         | <0.2       |
|                                     | rheumatoid lung disease with rheumatoid arthritis                | 0.0        | 0.0            | 0.1        | <0.2       | 0.0         | <0.2       |
|                                     | seronegative rheumatoid arthritis                                | 1.3        | 2.3            | 0.9        | 1.3        | 1.4         | 0.5        |
|                                     | seropositive rheumatoid arthritis                                | 1.8        | 5.0            | 1.9        | 3.6        | 4.5         | 1.9        |
| <b>Psoriasis</b>                    | arthritis mutilans                                               | 0.0        | 0.7            | 0.1        | <0.2       | 0.0         | 0.6        |
|                                     | guttate psoriasis                                                | 0.0        | <0.6           | 0.0        | <0.2       | 1.0         | <0.2       |
|                                     | <b>psoriasis</b>                                                 | <b>1.4</b> | <b>8.2</b>     | <b>2.7</b> | <b>5.4</b> | <b>26.4</b> | <b>4.4</b> |
|                                     | psoriasis vulgaris                                               | <0.9       | 2.8            | 1.0        | 0.5        | <0.6        | 1.7        |
|                                     | psoriasis with arthropathy                                       | 0.0        | 0.7            | 0.6        | 1.7        | 2.5         | 0.9        |
|                                     | psoriatic arthritis mutilans                                     | 0.0        | 0.0            | 0.1        | <0.2       | 0.0         | 0.6        |
|                                     | pustular psoriasis                                               | 0.0        | 0.9            | 0.1        | <0.2       | 0.0         | <0.2       |
| <b>Psoriatic Arthritis</b>          | arthritis mutilans                                               | 0.0        | 0.7            | 0.1        | <0.2       | 0.0         | 0.6        |
|                                     | <b>psoriasis with arthropathy</b>                                | <b>0.0</b> | <b>0.7</b>     | <b>0.6</b> | <b>1.7</b> | <b>2.5</b>  | <b>0.9</b> |
|                                     | psoriatic arthritis mutilans                                     | 0.0        | 0.0            | 0.1        | <0.2       | 0.0         | 0.6        |
| <b>Multiple sclerosis</b>           | <b>multiple sclerosis</b>                                        | <b>1.1</b> | <b>&lt;0.6</b> | <b>2.1</b> | <b>3.7</b> | <b>2.1</b>  | <b>1.6</b> |
| <b>Systemic lupus erythematosus</b> | lung disease with systemic lupus erythematosus                   | 0.0        | 0.0            | 0.1        | <0.2       | 0.0         | <0.2       |
|                                     | nephropathy co-occurrent and due to systemic lupus erythematosus | 1.1        | 0.0            | 0.3        | 1.0        | <0.6        | 0.2        |

|                              |                                                                |      |      |     |      |      |      |
|------------------------------|----------------------------------------------------------------|------|------|-----|------|------|------|
|                              | nephrosis co-occurrent and due to systemic lupus erythematosus | 1.1  | 0.0  | 0.3 | 1.0  | <0.6 | 0.2  |
|                              | sle glomerulonephritis syndrome                                | 1.1  | 0.0  | 0.3 | 1.0  | <0.6 | 0.2  |
|                              | systemic lupus erythematosus                                   | 3.2  | 1.7  | 1.9 | 4.3  | 2.6  | 0.9  |
|                              | systemic lupus erythematosus with organ/system involvement     | 1.4  | 1.2  | 0.5 | 1.5  | <0.6 | 0.2  |
| <b>Hashimoto thyroiditis</b> | hashimoto thyroiditis                                          | 0.0  | 0.0  | 0.0 | 0.9  | 0.0  | 0.0  |
| <b>Myasthenia gravis</b>     | myasthenia gravis                                              | <0.9 | <0.6 | 0.5 | 0.8  | 1.5  | 0.7  |
|                              | myasthenia gravis with exacerbation                            | <0.9 | 0.0  | 0.2 | 0.2  | 0.0  | 0.3  |
|                              | myasthenia gravis without exacerbation                         | <0.9 | 0.0  | 0.5 | 0.8  | 1.5  | 0.7  |
| <b>Vasculitis</b>            | acute hemorrhagic gastritis                                    | 0.0  | 6.9  | 0.4 | 0.4  | <0.6 | 0.5  |
|                              | antineutrophil cytoplasmic antibody positive vasculitis        | <0.9 | <0.6 | 0.2 | 0.4  | <0.6 | <0.2 |
|                              | arteritis                                                      | <0.9 | <0.6 | 0.8 | 1.8  | 3.8  | 0.9  |
|                              | autoimmune vasculitis                                          | 0.0  | <0.6 | 0.1 | <0.2 | <0.6 | <0.2 |
|                              | behcet's syndrome                                              | 0.0  | 0.9  | 0.0 | <0.2 | <0.6 | <0.2 |
|                              | capillaritis                                                   | 0.0  | <0.6 | 0.1 | 0.0  | <0.6 | <0.2 |
|                              | deep thrombophlebitis                                          | <0.9 | 1.6  | 0.3 | <0.2 | 8.6  | 0.4  |
|                              | deep vein phlebitis and thrombophlebitis of the leg            | <0.9 | 1.6  | 0.3 | <0.2 | 8.6  | 0.4  |
|                              | granulomatosis with polyangiitis                               | <0.9 | 0.0  | 0.2 | 0.4  | <0.6 | <0.2 |
|                              | granulomatosis with polyangiitis with multisystem involvement  | <0.9 | 0.0  | 0.1 | <0.2 | 0.0  | <0.2 |
|                              | hypersensitivity angiitis                                      | 0.0  | <0.6 | 0.1 | 0.4  | <0.6 | <0.2 |
|                              | idiopathic capillaritis                                        | 0.0  | <0.6 | 0.1 | 0.0  | <0.6 | <0.2 |
|                              | microscopic polyarteritis nodosa                               | 0.0  | <0.6 | 0.1 | <0.2 | 0.0  | <0.2 |
|                              | necrotizing vasculitis                                         | 0.0  | <0.6 | 0.1 | <0.2 | 1.0  | 0.2  |
|                              | phlebitis                                                      | 1.8  | 4.7  | 2.8 | 4.7  | 15.5 | 2.3  |
|                              | phlebitis and thrombophlebitis                                 | <0.9 | 1.6  | 1.0 | 1.3  | 11.9 | 1.1  |
|                              | phlebitis of deep veins of lower extremity                     | <0.9 | 1.6  | 0.5 | 0.3  | 8.6  | 0.5  |
| phlebitis of lower limb vein | 1.1                                                            | 3.0  | 2.2  | 3.5 | 12.2 | 1.6  |      |

|                           |                                                               |                |                |            |            |             |            |
|---------------------------|---------------------------------------------------------------|----------------|----------------|------------|------------|-------------|------------|
|                           | phlebitis of superficial veins of lower extremity             | <0.9           | <0.6           | 0.4        | 0.4        | 0.0         | <0.2       |
|                           | phlebitis of the femoral vein                                 | 0.0            | 0.0            | 0.2        | <0.2       | 0.0         | <0.2       |
|                           | pigmented purpuric lichenoid dermatitis of gougerot and blum  | 0.0            | <0.6           | 0.1        | 0.0        | <0.6        | <0.2       |
|                           | polyarteritis                                                 | 0.0            | <0.6           | 0.1        | 0.2        | 0.0         | <0.2       |
|                           | polyarteritis nodosa                                          | 0.0            | <0.6           | 0.1        | 0.2        | 0.0         | <0.2       |
|                           | primary necrotizing systemic vasculitis                       | 0.0            | <0.6           | 0.1        | <0.2       | 0.0         | <0.2       |
|                           | primary systemic arteritis                                    | 0.0            | <0.6           | 0.1        | 0.3        | 0.0         | <0.2       |
|                           | primary systemic vasculitis                                   | <0.9           | 1.7            | 0.3        | 0.5        | 0.6         | 0.5        |
|                           | rheumatoid vasculitis                                         | <0.9           | <0.6           | 0.1        | <0.2       | 0.0         | <0.2       |
|                           | secondary systemic vasculitis                                 | <0.9           | <0.6           | 0.1        | 0.2        | <0.6        | <0.2       |
|                           | small vessel vasculitis                                       | <0.9           | <0.6           | 0.3        | 0.4        | <0.6        | 0.2        |
|                           | small vessel vasculitis caused by immune complex              | 0.0            | <0.6           | 0.1        | <0.2       | <0.6        | <0.2       |
|                           | systemic vasculitis                                           | 1.1            | 2.6            | 0.4        | 0.7        | 0.6         | 0.5        |
|                           | temporal arteritis                                            | <0.9           | <0.6           | 0.3        | 0.7        | 1.0         | 0.4        |
|                           | thromboangiitis                                               | <0.9           | <0.6           | 0.0        | 0.0        | <0.6        | 0.2        |
|                           | thromboangiitis obliterans                                    | <0.9           | <0.6           | 0.0        | 0.0        | <0.6        | 0.2        |
|                           | thrombophlebitis                                              | <0.9           | 3.3            | 1.0        | 1.4        | 11.9        | 1.1        |
|                           | thrombophlebitis of deep veins of lower extremity             | <0.9           | 1.6            | 0.3        | <0.2       | 8.6         | 0.4        |
|                           | thrombophlebitis of lower extremities                         | <0.9           | 2.2            | 0.3        | <0.2       | 8.6         | 0.4        |
|                           | varicose veins of lower extremity with inflammation           | <0.9           | 1.2            | 1.4        | 2.8        | 3.7         | 1.0        |
|                           | varicose veins of lower extremity with ulcer and inflammation | <0.9           | 0.0            | 0.3        | 0.5        | 0.0         | 0.3        |
|                           | <b>vasculitis</b>                                             | <b>3.4</b>     | <b>14.4</b>    | <b>4.4</b> | <b>7.7</b> | <b>20.8</b> | <b>4.4</b> |
|                           | vasculitis of medium sized vessel                             | 0.0            | <0.6           | 0.1        | 0.2        | 0.0         | <0.2       |
|                           | vasculitis of the skin                                        | 0.0            | <0.6           | 0.1        | 0.2        | <0.6        | 0.3        |
| <b>Pernicious anaemia</b> | <b>pernicious anaemia</b>                                     | <b>0.0</b>     | <b>0.0</b>     | <b>0.0</b> | <b>0.4</b> | <b>0.0</b>  | <b>0.0</b> |
| <b>Coeliac disease</b>    | <b>coeliac disease</b>                                        | <b>&lt;0.9</b> | <b>&lt;0.6</b> | <b>0.3</b> | <b>0.9</b> | <b>1.2</b>  | <b>0.4</b> |
| <b>Scleroderma</b>        | crest syndrome                                                | <0.9           | 0.0            | 0.1        | <0.2       | 0.0         | 0.0        |

|                           |                                                                   |                |                |            |            |            |                |
|---------------------------|-------------------------------------------------------------------|----------------|----------------|------------|------------|------------|----------------|
|                           | limited systemic sclerosis                                        | <0.9           | 0.0            | 0.1        | <0.2       | 0.0        | 0.0            |
|                           | localized scleroderma                                             | 0.0            | <0.6           | 0.0        | 0.2        | 0.6        | <0.2           |
|                           | <b>systemic sclerosis</b>                                         | <b>&lt;0.9</b> | <b>&lt;0.6</b> | <b>0.2</b> | <b>0.4</b> | <b>0.9</b> | <b>&lt;0.2</b> |
|                           | systemic sclerosis with limited cutaneous involvement             | <0.9           | 0.0            | 0.1        | <0.2       | 0.0        | 0.0            |
| <b>Sarcoidosis</b>        | cardiac sarcoidosis                                               | <0.9           | 0.0            | 0.1        | <0.2       | 0.0        | <0.2           |
|                           | cutaneous sarcoidosis                                             | 0.0            | 0.0            | 0.0        | <0.2       | <0.6       | 0.2            |
|                           | pulmonary sarcoidosis                                             | 1.3            | 0.0            | 0.6        | 0.6        | 0.6        | 1.6            |
|                           | sarcoid heart muscle disease                                      | <0.9           | 0.0            | 0.1        | <0.2       | 0.0        | <0.2           |
|                           | <b>sarcoidosis</b>                                                | <b>3.4</b>     | <b>0.0</b>     | <b>1.2</b> | <b>1.9</b> | <b>1.2</b> | <b>2.1</b>     |
|                           | sarcoidosis of lung with sarcoidosis of lymph nodes               | <0.9           | 0.0            | 0.1        | <0.2       | <0.6       | 0.3            |
| <b>Ulcerative colitis</b> | chronic ulcerative colitis                                        | 0.0            | 0.0            | 0.5        | 0.9        | <0.6       | <0.2           |
|                           | chronic ulcerative pancolitis                                     | 0.0            | 0.0            | 0.4        | 0.7        | <0.6       | <0.2           |
|                           | chronic ulcerative rectosigmoiditis                               | 0.0            | 0.0            | 0.1        | 0.2        | <0.6       | 0.0            |
|                           | complication due to chronic ulcerative pancolitis                 | 0.0            | 0.0            | 0.1        | 0.2        | 0.0        | 0.0            |
|                           | complication due to ulcerative colitis                            | 0.0            | 0.0            | 0.3        | 0.7        | 0.0        | 0.6            |
|                           | left sided ulcerative colitis                                     | 0.0            | 0.0            | 0.1        | 0.2        | <0.6       | 0.4            |
|                           | rectal hemorrhage due to ulcerative colitis                       | 0.0            | 0.0            | 0.1        | 0.2        | 0.0        | 0.4            |
|                           | <b>ulcerative colitis</b>                                         | <b>&lt;0.9</b> | <b>&lt;0.6</b> | <b>1.3</b> | <b>2.2</b> | <b>2.8</b> | <b>1.6</b>     |
|                           | ulcerative pancolitis                                             | 0.0            | 0.0            | 0.4        | 0.7        | <0.6       | <0.2           |
|                           | ulcerative proctocolitis                                          | 0.0            | 0.0            | 0.1        | 0.2        | <0.6       | 0.0            |
| <b>Crohn's disease</b>    | abscess of intestine co-occurrent and due to crohn's disease      | <0.9           | 0.0            | 0.1        | <0.2       | 0.0        | <0.2           |
|                           | complication due to crohn's disease                               | <0.9           | 0.0            | 0.5        | 1.5        | <0.6       | 1.0            |
|                           | complication due to crohn's disease of large intestine            | <0.9           | 0.0            | 0.2        | 1.0        | 0.0        | 0.6            |
|                           | complication due to crohn's disease of small and large intestines | <0.9           | 0.0            | 0.1        | 0.4        | 0.0        | 0.3            |
|                           | complication due to crohn's disease of small intestine            | <0.9           | 0.0            | 0.3        | 0.8        | 0.0        | 0.4            |

|                                                                  |      |      |     |      |      |      |
|------------------------------------------------------------------|------|------|-----|------|------|------|
| crohn's disease                                                  | 1.1  | <0.6 | 1.0 | 2.4  | 2.4  | 1.2  |
| crohn's disease of intestine                                     | <0.9 | <0.6 | 0.5 | 1.5  | <0.6 | 0.7  |
| crohn's disease of large bowel                                   | 0.0  | 0.0  | 0.3 | 1.2  | <0.6 | 0.4  |
| crohn's disease of small and large intestines                    | 0.0  | 0.0  | 0.1 | 0.5  | 0.0  | 0.2  |
| crohn's disease of small intestine                               | <0.9 | <0.6 | 0.4 | 1.0  | <0.6 | 0.5  |
| fistula of large intestine due to crohn's disease                | 0.0  | 0.0  | 0.0 | 0.3  | 0.0  | <0.2 |
| gastrointestinal crohn's disease                                 | <0.9 | <0.6 | 0.5 | 1.5  | <0.6 | 0.7  |
| intestinal obstruction due to crohn's disease                    | <0.9 | 0.0  | 0.1 | 0.3  | <0.6 | 0.2  |
| intestinal obstruction due to crohn's disease of large intestine | <0.9 | 0.0  | 0.1 | <0.2 | 0.0  | <0.2 |
| intestinal obstruction due to crohn's disease of small intestine | <0.9 | 0.0  | 0.1 | 0.2  | 0.0  | <0.2 |
| rectal hemorrhage due to crohn's disease                         | 0.0  | 0.0  | 0.1 | 0.4  | 0.0  | <0.2 |
| rectal hemorrhage due to crohn's disease of large intestine      | 0.0  | 0.0  | 0.0 | 0.2  | 0.0  | <0.2 |

**Supplementary table 3. Severe outcomes and mortality in 30 days post hospitalisation in patients with COVID-19 and prevalent autoimmune diseases**

| <b>Outcome</b>                                           | <b>Cohort</b> | <b>CUIMC</b> | <b>HIRA</b> | <b>IQVIA<br/>Open<br/>Claims</b> | <b>Optum<br/>EHR</b> | <b>SIDIAP-H</b> | <b>VA-<br/>OMOP</b> |
|----------------------------------------------------------|---------------|--------------|-------------|----------------------------------|----------------------|-----------------|---------------------|
| <b>Acute kidney injury</b>                               | COVID-19      | 9.9          | 2.8         | 16.7                             | 22.2                 | NA              | 31.1                |
|                                                          | Influenza     | 29.7         | 3.9         | 11.9                             | 16.4                 | 5.3             | 26.3                |
| <b>Acute myocardial<br/>infarction events</b>            | COVID-19      | 2.5          | 2.6         | 2.4                              | 6.3                  | NA              | 6.0                 |
|                                                          | Influenza     | 6.3          | NA          | 3.4                              | 4.1                  | <1.5            | 7.8                 |
| <b>Acute respiratory<br/>distress syndrome</b>           | COVID-19      | 14.7         | 2.1         | 31.5                             | 39.6                 | NA              | 42.8                |
|                                                          | Influenza     | 17.1         | NA          | 16.9                             | 28.7                 | 13.9            | 28.2                |
| <b>Cardiac arrhythmia<br/>during<br/>hospitalisation</b> | COVID-19      | 12.4         | 3.8         | 13.6                             | 29.5                 | NA              | 35.1                |
|                                                          | Influenza     | 24.6         | <3.3        | 17.0                             | 28.1                 | 19.2            | 32.0                |
| <b>Death</b>                                             | COVID-19      | 24.6         | 6.3         | NA                               | NA                   | 18.0            | 16.3                |
|                                                          | Influenza     | 3.4          | NA          | NA                               | NA                   | 2.2             | 4.3                 |
| <b>Heart failure during<br/>hospitalisation</b>          | COVID-19      | 8.4          | 3.9         | 8.0                              | 15.7                 | NA              | 24.5                |
|                                                          | Influenza     | 35.4         | 5.2         | 14.1                             | 20.5                 | 14.9            | 28.3                |
| <b>Pneumonia during<br/>hospitalisation</b>              | COVID-19      | 12.6         | 40.7        | 45.7                             | 53.2                 | NA              | 33.0                |
|                                                          | Influenza     | 28.0         | 25.5        | 30.1                             | 36.3                 | 22.6            | 19.5                |
| <b>Sepsis during<br/>hospitalisation</b>                 | COVID-19      | 4.7          | 4.9         | 17.3                             | 23.5                 | NA              | 21.6                |
|                                                          | Influenza     | 18.9         | <3.3        | 16.4                             | 21.1                 | 3.7             | 21.4                |
| <b>Stroke (ischaemic<br/>or haemorrhagic)<br/>events</b> | COVID-19      | 3.2          | 1.4         | 2.1                              | 2.6                  | NA              | 3.4                 |
|                                                          | Influenza     | <2.9         | <3.3        | 2.0                              | 2.6                  | <1.5            | 2.4                 |
| <b>Venous<br/>thromboembolic<br/>events</b>              | COVID-19      | 3.2          | 1.4         | 3.3                              | 7.6                  | NA              | 7.7                 |
|                                                          | Influenza     | 7.4          | <3.3        | 3.0                              | 4.1                  | 2.5             | 4.6                 |
